# Supplementary material for: Multicore–shell iron fluoride@carbon microspheres as a long-life cathode for high-energy lithium batteries
Source: Royal Society of Chemistry journal article supplement (doi:10.1039/d3ta05054h), 2023-01-01
Supplement: d3ta05054h1.pdf [file d3ta05054h1.pdf]

## Supporting Information

### Multicore-shell Iron Fluoride @ Carbon Microspheres as Long-life Cathode for High-Energy Lithium Battery

Ziang Jiang<sup>‡</sup>, Yujie Wang<sup>‡</sup>, Xuanfeng Chen, Fulu Chu, Xuansi Jiang, Felix Kwofie, Qianfan Pei, Shunrui Luo\*, Jordi Arbiol and Feixiang Wu\*

**Table S1.** Comparison between the experimental and the theoretical bulk plane spacing distances and angles between planes.

| Spot | Experimental (nm)        | FeF <sub>3</sub> (R-3c) [1-11] |
|------|--------------------------|--------------------------------|
| 1    | 0.136                    | 0.134 (242)                    |
| 2    | 0.178 (45.61° vs Spot 1) | 0.187 (45.86°) (022)           |
| 3    | 0.248 (87.92° vs Spot 1) | 0.260 (90,00°) (10-1)          |

**Table S2.** The corresponding  $R_s$  and  $R_{ct}$  fitted values.

| Cathode                     | $R_s$ ( $\Omega$ ) | $R_{ct}$ ( $\Omega$ ) |
|-----------------------------|--------------------|-----------------------|
| FeF <sub>3</sub> @C         | 20.55              | 129.5                 |
| Commercial FeF <sub>3</sub> | 26.96              | 190.8                 |

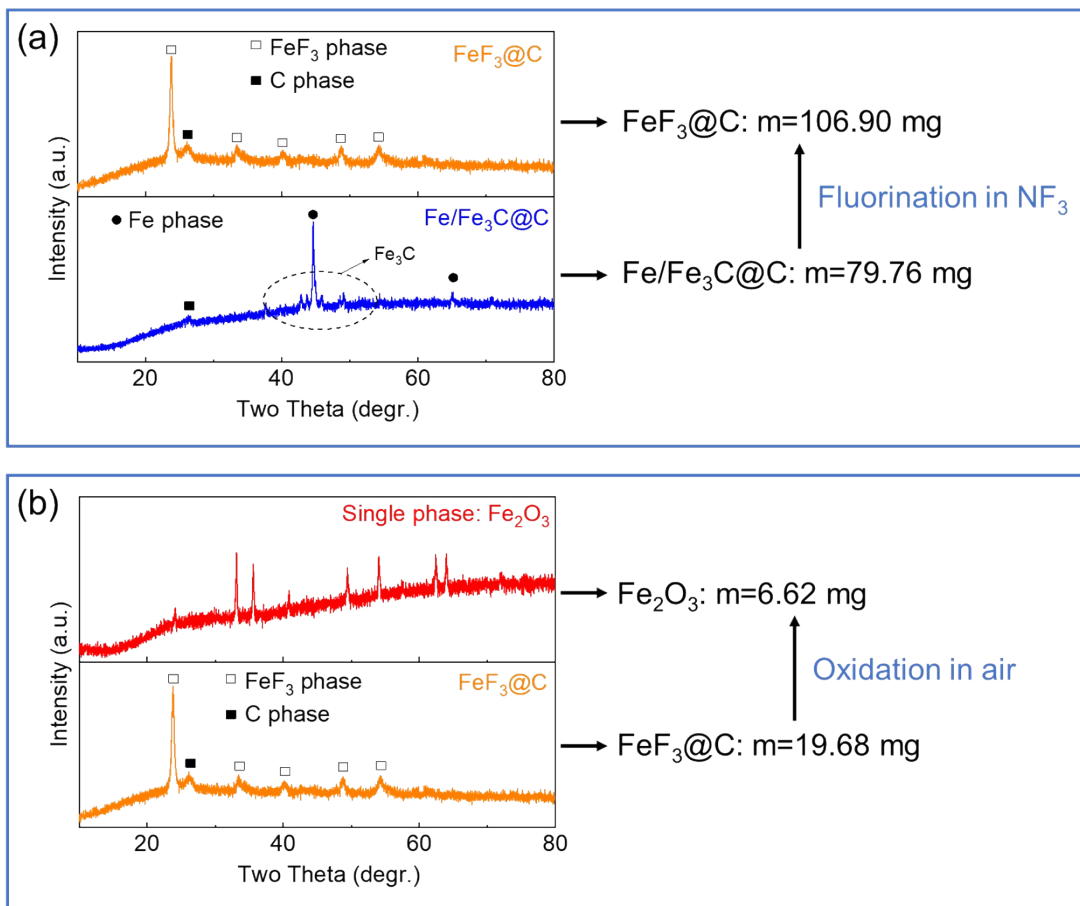

**Fig. S1** the phase and mass change of samples (a) before and after fluorination in  $\text{NF}_3/\text{Ar}$  (from  $\text{Fe}/\text{Fe}_3\text{C}@C$  to  $\text{FeF}_3@C$ ) or (b) thermogravimetric analysis in air (from  $\text{FeF}_3@C$  to  $\text{Fe}_2\text{O}_3$ )

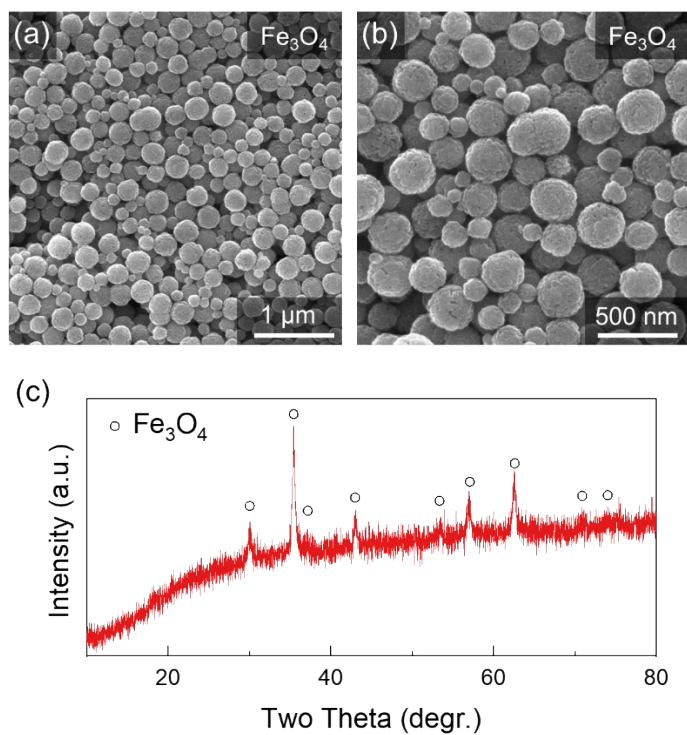

**Fig. S2** (a, b) SEM images and XRD pattern of  $\text{Fe}_3\text{O}_4$  microspheres.

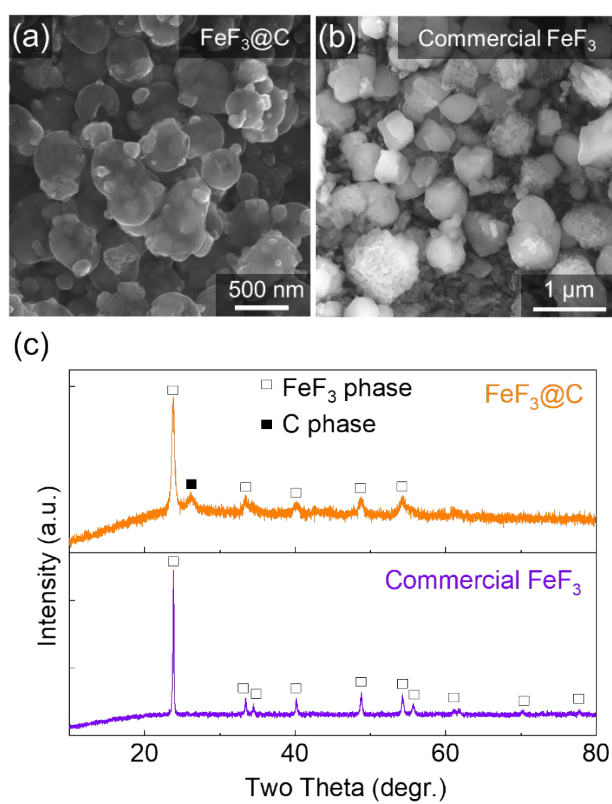

**Fig. S3** SEM images of (a)  $\text{FeF}_3@C$  composite and (b) commercial  $\text{FeF}_3$  particles; (c) Comparison of XRD patterns of the  $\text{FeF}_3@C$  composite and commercial  $\text{FeF}_3$  particles.

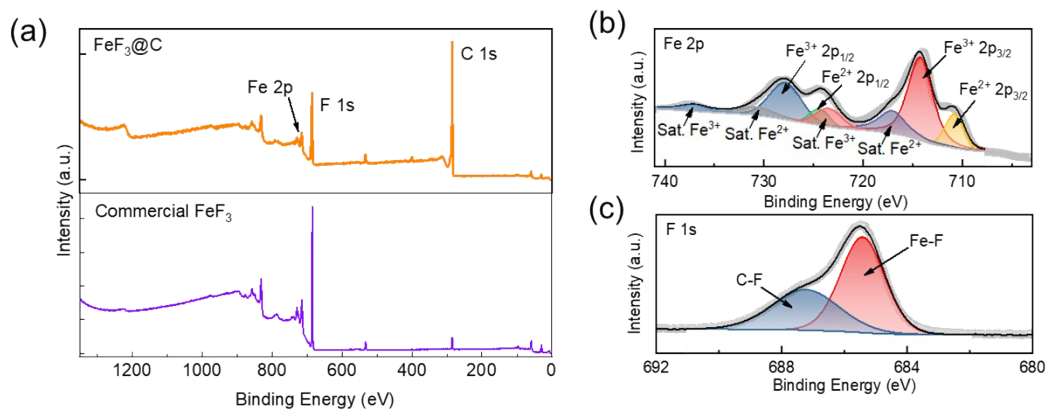

**Fig. S4** XPS spectra. (a) Full XPS analysis of the  $\text{FeF}_3@C$  and commercial  $\text{FeF}_3$  particles; (b) Fe 2p of the commercial  $\text{FeF}_3$  and (c) C 1s of the  $\text{FeF}_3@C$  composites.

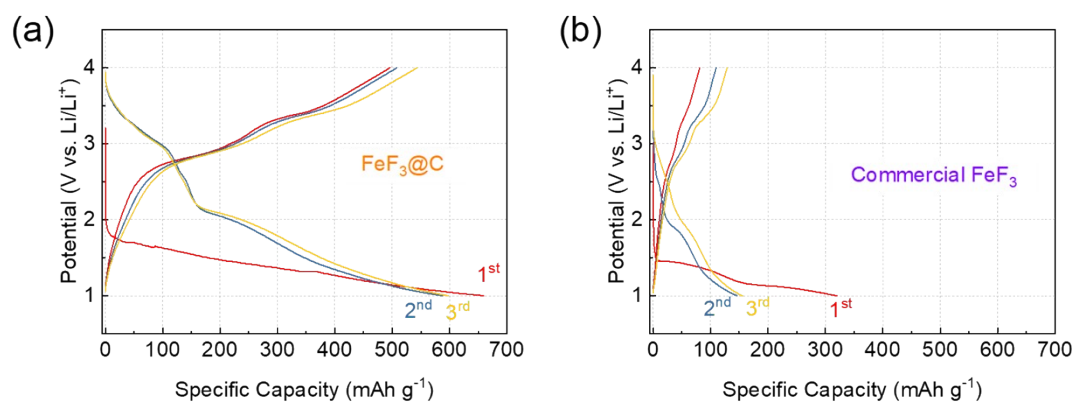

**Fig. S5** The galvanostatic charge/discharge profiles of (a) the  $\text{FeF}_3@C$  cathode in the first three cycles at 0.1C, the commercial  $\text{FeF}_3$  cathode (b) in the first three cycles at 0.1C.

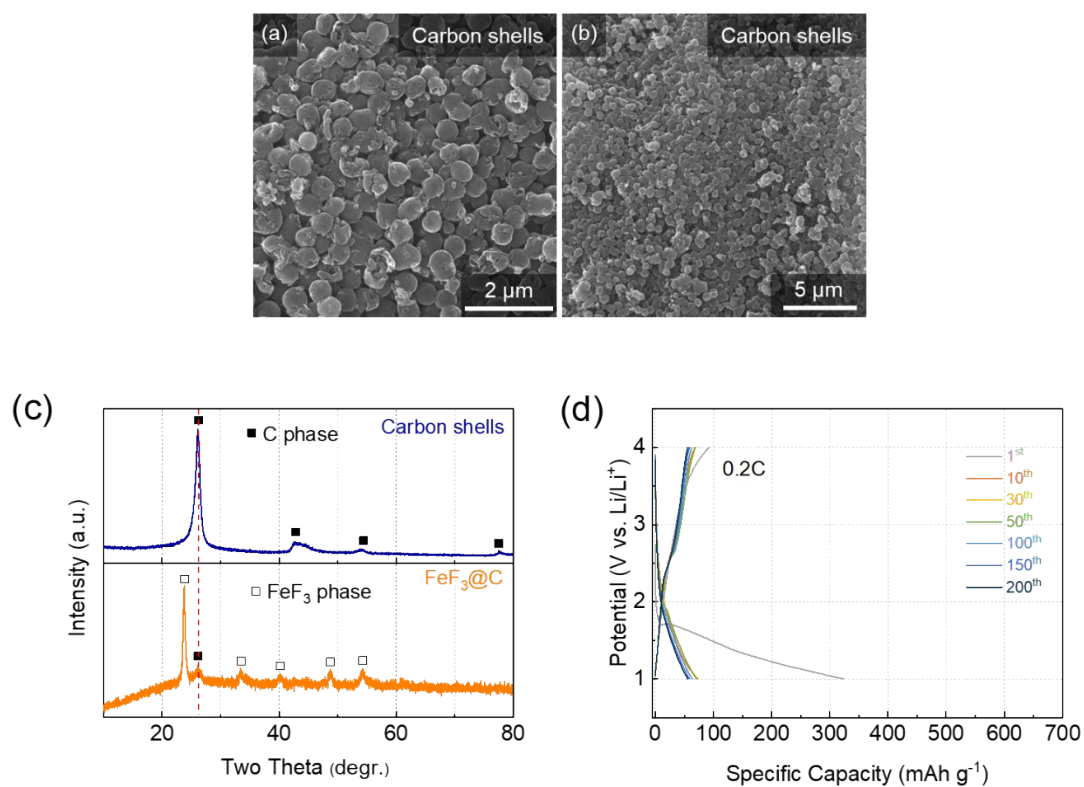

**Fig. S6** (a, b) SEM images of the FeF<sub>3</sub>@C particles after washing experiment using dilute HCl solution; (c) the XRD patterns of the FeF<sub>3</sub>@C composite before and after acid washing; (d, e) discharge-charge voltage profiles of the blank carbon shells.

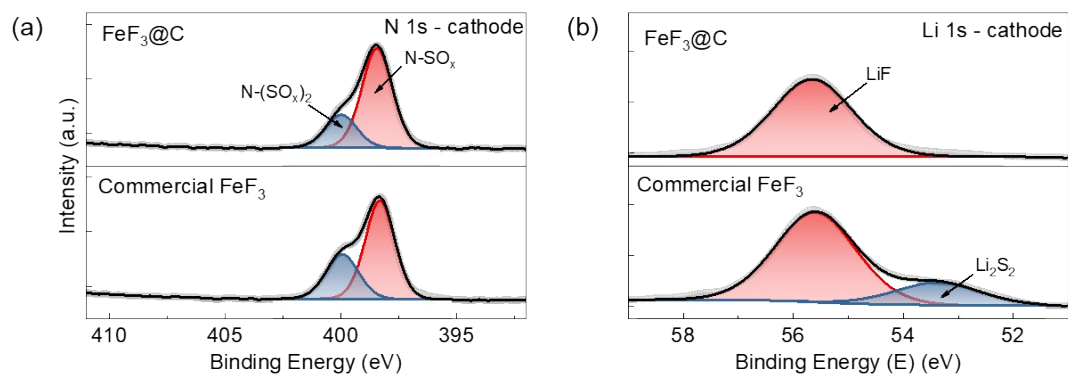

**Fig. S7** XPS spectra of (a) N 1s, (b) Li 1s from cycled cathodes.

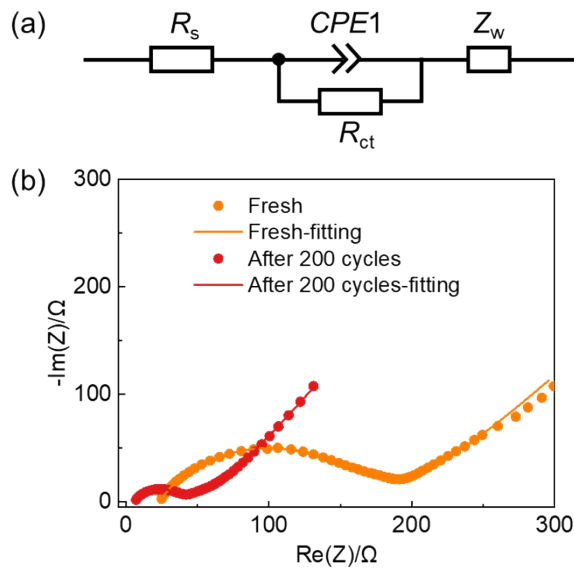

**Fig. S8** (a) Equivalent circuit of the EIS fitted; (b) Comparison of electrical impedance in the fresh and after-200-cycles  $FeF_3@C$  cathodes.

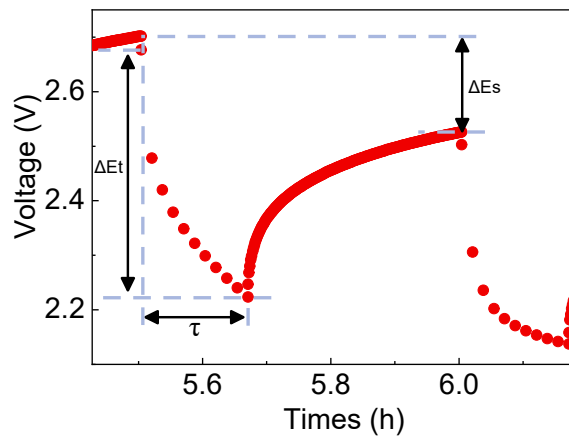

**Fig. S9** Schematic of the diffusion coefficient via the GITT method.

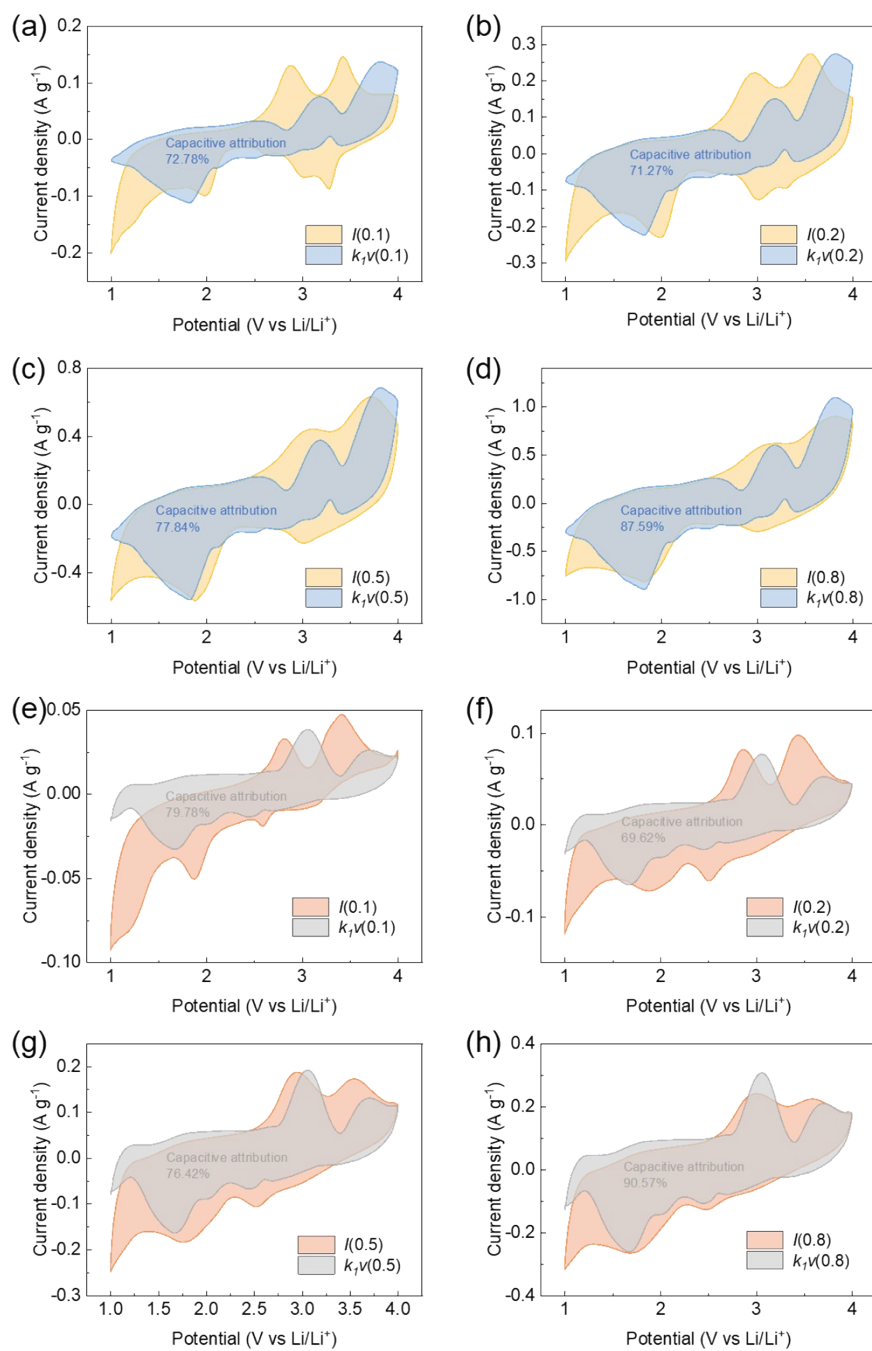

**Fig. S10** capacitive contribution and diffusion contribution for  $\text{FeF}_3@C$  cathode at (a)  $0.1 \text{ mV s}^{-1}$ , (b)  $0.2 \text{ mV s}^{-1}$ , (c)  $0.5 \text{ mV s}^{-1}$  and (d)  $0.8 \text{ mV s}^{-1}$ ; and for commercial  $\text{FeF}_3$  cathode at (e)  $0.1 \text{ mV s}^{-1}$ , (f)  $0.2 \text{ mV s}^{-1}$ , (g)  $0.5 \text{ mV s}^{-1}$  and (h)  $0.8 \text{ mV s}^{-1}$ .
